# Supplementary material
Source: MDPI journal article supplement (https://www.mdpi.com/2073-4395/11/8/1505)
Supplement: s1 [file s1]

**Supplemental Table S1.** Mean values corresponding to 58 orchardgrass families and three commercial cultivars evaluated in 2013 and 2014 at Lewiston and Millville, UT, under frequent and infrequent harvest frequencies. Means are across years, location, and harvest frequencies. Traits are maturity (MAT; 1—very late to 5—very early), herbage dry mass (HDM; Mg ha<sup>-1</sup>), crude protein (CP; g kg<sup>-1</sup>), in vitro true digestibility (IVTD; g kg<sup>-1</sup>), neutral detergent fiber digestibility (NDFD; g kg<sup>-1</sup>), and water soluble carbohydrate concentration (WSC; g kg<sup>-1</sup>). Values in the statistically highest grouping for each trait are italicized and bolded.

| HSF    | MAT        | HDM         | CP         | IVTD       | NDFD       | WSC       |
|--------|------------|-------------|------------|------------|------------|-----------|
| LaS_5  | <b>3.7</b> | 18.5        | <b>190</b> | <b>848</b> | 728        | 56        |
| LaS_12 | <b>3.7</b> | 17.9        | 175        | 841        | 719        | 59        |
| PoS_7  | <b>3.7</b> | 17.7        | 174        | 834        | 715        | 55        |
| U2_1   | <b>3.6</b> | 17.1        | 172        | 845        | 735        | 60        |
| I5_5   | <b>3.5</b> | 17.4        | 175        | 843        | <b>745</b> | 58        |
| PaS_2  | <b>3.5</b> | <b>18.6</b> | 165        | 837        | 708        | 58        |
| PoS_1  | <b>3.5</b> | <b>19.2</b> | 171        | 845        | 709        | 56        |
| I4_1   | <b>3.4</b> | <b>20.1</b> | 180        | <b>852</b> | 723        | <b>62</b> |
| Paiute | <b>3.2</b> | 16.9        | 177        | 840        | 723        | 54        |
| I5_4   | <b>3.2</b> | 17.0        | 172        | 844        | 718        | 60        |
| LaS_9  | <b>3.2</b> | 16.7        | 171        | 839        | 714        | <b>63</b> |
| PaS_1  | <b>3.2</b> | 17.9        | 176        | 838        | 723        | 52        |
| PoS_5  | <b>3.2</b> | 17.1        | 180        | 843        | <b>747</b> | 55        |
| PoS_14 | <b>3.2</b> | 17.4        | 174        | 841        | 710        | 56        |
| PoS_11 | <b>3.2</b> | 18.3        | 172        | 833        | 707        | 53        |
| PoS_12 | <b>3.2</b> | 17.1        | 172        | 844        | 723        | 55        |
| LaS_15 | <b>3.1</b> | 17.2        | 179        | 842        | 725        | 57        |
| LaS_14 | <b>3.1</b> | 16.4        | 180        | 842        | 709        | 53        |
| PoS_3  | <b>3.1</b> | <b>18.9</b> | 179        | 843        | 715        | 54        |
| PoS_9  | <b>3.1</b> | 17.5        | 176        | 832        | 701        | 48        |
| PoS_13 | <b>3.1</b> | 17.1        | 173        | 838        | 711        | 54        |
| PoS_10 | <b>3.1</b> | 18.0        | 169        | 841        | <b>761</b> | 48        |
| I3_1   | 3.0        | 18.2        | 176        | 838        | 709        | 55        |
| I4_2   | 3.0        | 17.9        | 181        | 844        | 704        | 58        |
| I5_6   | 3.0        | 18.1        | 178        | 841        | 723        | 55        |
| I5_3   | 3.0        | <b>18.6</b> | 181        | 844        | 725        | 58        |
| PaS_5  | 3.0        | 17.4        | 172        | 838        | 718        | 58        |
| I5_7   | 2.9        | 16.4        | 176        | 843        | 715        | 56        |
| LaS_1  | 2.9        | 17.6        | 176        | 840        | 724        | 57        |
| PaS_3  | 2.9        | 17.2        | 177        | <b>851</b> | 736        | 61        |
| I3_2   | 2.8        | 17.6        | <b>187</b> | <b>848</b> | 733        | 55        |
| LaS_2  | 2.8        | 18.1        | 176        | 842        | 720        | 58        |
| LaS_6  | 2.8        | 16.6        | 171        | 836        | 717        | 54        |
| PoS_15 | 2.8        | 17.7        | 173        | 840        | 699        | 54        |

|          |        |             |            |            |            |           |
|----------|--------|-------------|------------|------------|------------|-----------|
| Potomac  | 2.7    | 16.3        | 180        | 842        | 731        | 55        |
| LaS_10   | 2.7    | 16.5        | 178        | 842        | <b>747</b> | 58        |
| PaS_6    | 2.7    | 17.4        | 168        | 835        | 728        | 56        |
| I3_3     | 2.6    | 17.3        | 173        | 839        | 711        | 49        |
| PaS_7    | 2.6    | 17.3        | 174        | 833        | 712        | 54        |
| I5_1     | 2.5    | 16.6        | 172        | 842        | 728        | <b>62</b> |
| I5_2     | 2.5    | 17.3        | 177        | <b>847</b> | 733        | 59        |
| LaS_8    | 2.5    | 18.0        | 175        | 837        | 695        | 59        |
| LaS_13   | 2.5    | 17.4        | 177        | 844        | 709        | 58        |
| LaS_7    | 2.4    | 18.1        | 170        | 845        | 709        | 58        |
| PaS_4    | 2.4    | 16.7        | 174        | 839        | 727        | 58        |
| Icon     | 2.3    | 16.6        | 178        | 845        | 726        | 60        |
| LaS_4    | 2.3    | 17.1        | 167        | 842        | 685        | 61        |
| LaS_11   | 2.3    | <b>19.1</b> | 179        | 835        | 709        | 57        |
| PaS_9    | 2.3    | 16.3        | 181        | <b>852</b> | 732        | 56        |
| PaS_11   | 2.3    | 15.3        | 174        | 842        | 719        | 60        |
| PoS_4    | 2.3    | 17.4        | 178        | 844        | 714        | 60        |
| PoS_6    | 2.3    | 16.6        | 169        | 838        | 707        | <b>62</b> |
| PoS_8    | 2.3    | 18.0        | 174        | 836        | 711        | 53        |
| LaS_3    | 2.2    | <b>19.0</b> | 179        | 842        | 730        | 51        |
| I3_4     | 2.0    | 16.8        | 164        | 790        | 720        | <b>68</b> |
| PaS_12   | 2.0    | 16.2        | 167        | 838        | 717        | 54        |
| U2_2     | 2.0    | 17.1        | 177        | 842        | <b>740</b> | 55        |
| PaS_10   | 1.8    | 16.7        | 176        | <b>846</b> | 723        | 55        |
| PaS_13   | 1.8    | 17.9        | 173        | <b>846</b> | <b>740</b> | <b>62</b> |
| PoS_2    | 1.6    | <b>19.0</b> | <b>185</b> | <b>848</b> | 731        | 57        |
| PaS_8    | 1.5    | 17.2        | 171        | 842        | 719        | <b>66</b> |
| LSD 5%   | 0.8    | 1.6         | 9          | 7          | 23         | 7         |
| <i>p</i> | <0.001 | 0.007       | 0.04       | <0.001     | 0.005      | 0.008     |

---
